# Supplementary material
Source: PubMed Central journal article supplement (PMC64732)
Supplement: pnas_251551698_1.pdf [file pnas_251551698_1.pdf]

Supporting information for Israel *et al.* (November 27, 2001) *Proc. Natl. Acad. Sci. USA*, 10.1073/pnas.251551698.

**Table 2. Oligonucleotide primers used in this study**

| Oligonucleotide name | Forward/reverse | J99 ORF | 26695 ORF | Sequence                | Gene name         | Ref.       |
|----------------------|-----------------|---------|-----------|-------------------------|-------------------|------------|
| JHP39                | F               | JHP39   |           | GCATCAAAGAAGCTTATGAG    |                   | This study |
| JHP40                | F               | JHP40   |           | GAATTGCTGCCTAGGATTTG    |                   | This study |
| JHP0130R             | R               | JHP0130 | HP0142    | AGAGCTTATGGGTAAGGTCTC   | <i>mutY</i>       | This study |
| JHP0130F             | F               | JHP0130 | HP0142    | TCTATATCAGCGAAGTGATGAG  | <i>mutY</i>       | This study |
| JHP923F              | F               | JHP923  |           | TAAGGAGCGGTAAGGAATAC    |                   | This study |
| JHP923R              | R               | JHP923  |           | CTCTTCAATAGGATTTGCTTG   |                   | This study |
| JHP924F              | F               | JHP924  |           | CTACAATACCGCTAACGAAG    |                   | This study |
| JHP924R              | R               | JHP924  |           | TGATCCTGCCTTGACAATG     |                   | This study |
| JHP925R              | R               | JHP925  |           | TCCTTGCTTTCCAGTTCTTC    |                   | This study |
| JHP926F              | F               | JHP926  |           | AATGGGAGGGCTTAAGCAAG    |                   | This study |
| JHP926R              | R               | JHP926  |           | TTGTTGCTTTGTTTCATTTGC   |                   | This study |
| JHP927F              | F               | JHP927  |           | CAACAATTGCTTTCAGCAAC    |                   | This study |
| JHP927R              | R               | JHP927  |           | GAATGATTGCTTGCACCTAAG   |                   | This study |
| JHP928F              | F               | JHP928  |           | GGAGCGATCGAGTGATGAAG    |                   | This study |
| JHP928R              | R               | JHP928  |           | TCACTGCGTCTATCAAGCTC    |                   | This study |
| JHP929/931F          | F               | JHP929  |           | GAGCCAGCTACAGAACAAGTGA  |                   | This study |
| JHP929/931R          | R               | JHP931  |           | GAGCATATCTGCAACTCGTCTT  |                   | This study |
| JHP939F              | F               | JHP939  |           | GCTAAGGTGGACGGCTCTC     |                   | This study |
| JHP939R              | R               | JHP939  |           | TCGCCACTCATATTAGCCATAG  |                   | This study |
| JHP941F              | F               | JHP941  |           | TTGCCCTAGATAGACATTACGC  |                   | This study |
| JHP941R              | R               | JHP941  |           | GCCACTTTCTTGTTATGCTCTTG |                   | This study |
| JHP944F              | F               | JHP944  |           | CTAATGAAGAAATGCAAGTGC   |                   | This study |
| JHP944R              | R               | JHP944  |           | TTTGCTTCCAAGATCCCATG    |                   | This study |
| JHP945F              | F               | JHP945  |           | CTGCTCCAGTCCAGTTATGC    |                   | This study |
| JHP945R              | R               | JHP945  |           | GCGCTTTGGTTTGAGCGATG    |                   | This study |
| JHP1211              | F               | JHP1211 |           | CTAAATCGGTGGTGCTAGTG    |                   | This study |
| JHP1212              | F               | JHP1212 |           | CTCCCTCTGGCCACCATTG     |                   | This study |
| HP0153F              | F               |         | HP0153    | AAGATTGACTCTATTTCTACAG  | <i>recA</i>       | This study |
| HP0153R              | R               |         | HP0153    | TAATCTTAAGAGTGATTTTCATC | <i>recA</i>       | This study |
| HP0995F              | F               |         | HP0995    | AAACTTCACGCCCATCAAG     |                   | This study |
| HP0995R              | R               |         | HP0995    | TTCATCACTAAGCCAAGCATTG  |                   | This study |
| HP0996F              | F               | JHP0942 | HP0996    | AGCCAGATGAAGAGACAATGC   |                   | This study |
| HP0996R              | R               | JHP0942 | HP0996    | ATCCAGCATGAGCTTTAGGG    |                   | This study |
| HP0997F              | F               |         | HP0997    | TGCAAATGGCGTTAAGACAG    | IS605 <i>tnpB</i> | This study |

|           |   |         |        |                          |                                           |            |
|-----------|---|---------|--------|--------------------------|-------------------------------------------|------------|
| HP0997R   | R |         | HP0997 | CGTTAGAGGAAGCTCCACAAG    | IS605 <i>mpB</i>                          | This study |
| HP0998F   | F |         | HP0998 | GGGTATATTTCAACCAACAGAAG  | IS605 <i>mpA</i>                          | This study |
| HP0998R   | R |         | HP0998 | GCCTCACCGATAGAGCAAAC     | IS605 <i>mpA</i>                          | This study |
| HP0999F   | F |         | HP0999 | AGCCTGTGTTCAACCCTAAATC   |                                           | This study |
| HP0999R   | R |         | HP0999 | TACGCTTCTTGTTGGCTTG      |                                           | This study |
| HP1000F   | F |         | HP1000 | AAAGGAGGGAGCGGTAAATC     |                                           | This study |
| HP1000R   | R |         | HP1000 | TTTGATCCTTAAATACCCGTTT   |                                           | This study |
| HP1001F   | F |         | HP1001 | AATGCCAACAAGCATGAAAC     |                                           | This study |
| HP1001R   | R |         | HP1001 | TCACAACCTTGCTCGCCTTATC   |                                           | This study |
| HP1002F   | F |         | HP1002 | AATGGGATTAGGCGTGAGTG     |                                           | This study |
| HP1002R   | R |         | HP1002 | CCCAAGCCTTTGTTATCATCTC   |                                           | This study |
| HP1003F   | F |         | HP1003 | GGCAACTTAAAGAAGTGAGATGG  |                                           | This study |
| HP1003R   | R |         | HP1003 | AGGGTTTGTGTTTCATTGG      |                                           | This study |
| HP1004F   | F |         | HP1004 | AAACTTTGAAAGCGATGAGC     |                                           | This study |
| HP1004R   | R |         | HP1004 | TTTCTAGTGCATCTAGCTCTGTTT |                                           | This study |
| HP1005F   | F |         | HP1005 | GCAACTGCACAATTTCTTAAAC   |                                           | This study |
| HP1005R   | R |         | HP1005 | GCATTATGCCTTTCTCTTTCTTG  |                                           | This study |
| HP1006F   | F |         | HP1006 | GAAATGCCAGCATTAAAGTAGGAG |                                           | This study |
| HP1006R   | R |         | HP1006 | CTTCATTGGGCTTGACTTCC     |                                           | This study |
| HP1007F   | F |         | HP1007 | CTTGTGAGATAAACAACCATG    | IS606 <i>mpB</i>                          | This study |
| HP1007R   | R |         | HP1007 | GGCTTTGTTCTTTAAAGTCTGC   | IS606 <i>mpB</i>                          | This study |
| HP1008F   | F |         | HP1008 | ATGATATGAGACACGGAAGAC    |                                           | This study |
| HP1008R   | R |         | HP1008 | CGTCACTTTTGGAGGGTAG      |                                           | This study |
| HP1009F   | F |         | HP1009 | TTCTGCAAGCCATTTGAAAG     |                                           | This study |
| HP1009R   | R |         | HP1009 | ATAAGCGGTGCGAGTGTGTC     |                                           | This study |
| HP1010F   | F | JHP0413 | HP1010 | TCTCCTATGCGTCATCAAAC     | <i>ppk</i>                                | This study |
| HP1010R   | R | JHP0413 | HP1010 | CCTGCGAATTTAAAGGATCG     | <i>ppk</i>                                | This study |
| CAGIR-R   | R |         |        | AAAGTGGAAATTTTCATGC      | Downstream<br>of <i>cagA</i>              | 1          |
| CAGIR-L   | F |         |        | AAGGATTAAGGAATACC        | Downstream<br>of <i>cagA</i>              | 1          |
| VACAP-R1  | R |         |        | GTGTGTTTGTGTTATTCCAT     | <i>vacA</i><br>promoter                   | 1          |
| VACAP-L1  | F |         |        | ACAAGGCACGATCTGGG        | <i>vacA</i><br>promoter                   | 1          |
| J99 unk1F | F |         |        | TAGTATTCTTGAAATGGCGC     | New<br>sequence<br>between 929<br>and 931 | This study |
| J99 unk1R | R |         |        | GTAAAGTTCTTCTGTGTAG      | New<br>sequence                           | This study |

|  |  |  |  |  |                        |  |
|--|--|--|--|--|------------------------|--|
|  |  |  |  |  | between 929<br>and 931 |  |
|--|--|--|--|--|------------------------|--|

l. Bereswill, S., Schonenberger, R., Thies, C., Stahler, F., Strobel, S., Pfefferle, P., Wille, L. & Kist, M.  
(2000) *Med. Microbiol. Immunol.* **189**, 105-113.
