# Supplementary material
Source: PubMed Central journal article supplement (PMC64732)
Supplement: pnas_251551698_2.pdf [file pnas_251551698_2.pdf]

Supporting information for Israel *et al.* (November 27, 2001) *Proc. Natl. Acad. Sci. USA*, 10.1073/pnas.251551698.

**Table 3. Diversity of recent J99 isolates is indicated by absence of archival J99 ORFs and presence of sequences with homology to 26695-specific ORFs**

| ORFs              | Isolate         |        |    |    |     |     |        |     |     |     |     |        |          |    |
|-------------------|-----------------|--------|----|----|-----|-----|--------|-----|-----|-----|-----|--------|----------|----|
|                   | J99<br>Archival | Antrum |    |    |     |     | Corpus |     |     |     |     | Cardia | Duodenum |    |
|                   |                 | A1     | A3 | A5 | A7  | A9  | C3     | C4  | C6  | C10 | C12 | Ca     | D1       | D3 |
| J99<br>specific   | 100             | 100    | 91 | 88 | 100 | 100 | 100    | 100 | 100 | 86  | 91  | 91     | 100      | 86 |
| Common            | 99              | 99     | 99 | 99 | 99  | 99  | 99     | 99  | 99  | 99  | 99  | 99     | 99       | 99 |
| 26695<br>specific | 3               | 17     | 14 | 15 | 16  | 16  | 15     | 15  | 17  | 17  | 14  | 14     | 16       | 18 |

Numbers indicate percent of ORFs present in the J99 archival and 13 recent J99 isolates as indicated by positive hybridization with microarray.
